# Supplementary material
Source: PubMed Central journal article supplement (PMC6922052)
Supplement: NIHMS1537619-supplement-Supplemental_Digital_Content_1.pdf [file NIHMS1537619-supplement-Supplemental_Digital_Content_1.pdf]

## Appendix 1. Follow-up Cohort Demographic and Delivery Characteristics

|                                             | <b>Controls<br/>N=232<br/>n (%)</b> | <b>Cases<br/>N=121<br/>n (%)</b> | <b>p-value</b> |
|---------------------------------------------|-------------------------------------|----------------------------------|----------------|
| Age (years)                                 | 30 [26-34]                          | 31 [27-35]                       | 0.2            |
| Race                                        |                                     |                                  |                |
| Caucasian                                   | 161 (69.4%)                         | 74 (61.2%)                       | <0.001         |
| Non-Hispanic Black                          | 36 (15.5%)                          | 38 (31.4%)                       |                |
| Asian or Pacific Islander                   | 25 (10.8%)                          | 5 (4.1%)                         |                |
| Other or Unspecified                        | 10 (4.3%)                           | 4 (3.3%)                         |                |
| Pre-pregnancy BMI (kg/m <sup>2</sup> )†     | 23.8 [21.1-28.2]                    | 28.3 [24.0-34.0]                 | <0.001         |
| Highest first trimester systolic BP (mmHg)  | 112 [104-120]                       | 118 [112-124]                    | <0.001         |
| Highest first trimester diastolic BP (mmHg) | 70 [62-78]                          | 71 [68-80]                       | 0.02           |
| Nulliparous                                 | 120 (51.7%)                         | 45 (37.2%)                       | 0.009          |
| Multiparous                                 | 112 (48.3%)                         | 76 (62.8%)                       |                |
| Gestational diabetes                        | 11 (4.7%)                           | 12 (9.9%)                        | 0.06           |
| Gestational age at delivery (weeks)         | 38.4 [38.8-40.4]                    | 39.0 [37.7-39.9]                 | <0.001         |
| Birthweight (grams)                         | 3370 [2995-3650]                    | 3260 [2878-3614]                 | 0.1            |
| Cesarean delivery                           | 52 (22.4%)                          | 49 (40.5%)                       | <0.001         |
| Length of hospitalization (days)            | 2 [2-2]                             | 2 [2-3]                          | 0.04           |

Data are n (%) or median [interquartile range] unless otherwise specified

†N=224 controls (BMI data missing)

## Appendix 2. Demographics and Delivery Outcomes for Women With Available Follow-up Data

|                                             | <b>Controls<br/>N=169</b> | <b>Cases<br/>N=86</b> | <b>p-value</b> |
|---------------------------------------------|---------------------------|-----------------------|----------------|
| Age (years)                                 | 30 [26-34]                | 32 [27-35]            | 0.1            |
| Race                                        |                           |                       |                |
| Caucasian                                   | 120 (71.0%)               | 50 (58.1%)            | 0.005          |
| Non-Hispanic Black                          | 30 (17.8%)                | 29 (33.7%)            |                |
| Asian or Pacific Islander                   | 14 (8.3%)                 | 4 (4.7%)              |                |
| Other or Unspecified                        | 5 (3.0%)                  | 3 (3.5%)              |                |
| Pre-pregnancy BMI (kg/m <sup>2</sup> )†     | 23.5 [21.1-27.7]          | 29.2 [24.3-36.9]      | <0.001         |
| Highest first trimester systolic BP (mmHg)  | 114 [104-120]             | 120 [113-127]         | <0.001         |
| Highest first trimester diastolic BP (mmHg) | 70 [62-78]                | 72 [68-80]            | 0.03           |
| Nulliparous                                 | 91 (53.9%)                | 32 (37.2%)            | 0.007          |
| Multiparous                                 | 78 (46.2%)                | 54 (62.8%)            |                |
| Gestational diabetes                        | 6 (3.6%)                  | 11 (12.8%)            | 0.04           |
| Gestational age at delivery (weeks)         | 39.4 [39.0-40.4]          | 39 [37.6-39.9]        | 0.004          |
| Birthweight (grams)                         | 3360 [2985-3665]          | 3260 [2860-3560]      | 0.07           |
| Cesarean delivery                           | 43 (25.4%)                | 32 (37.2%)            | 0.03           |
| Length of hospitalization (days)            | 2 [2-2]                   | 2 [2-3]               | 0.08           |

Data are n (%) or median [interquartile range] unless otherwise specified

†N=164 controls (BMI data missing)

### Appendix 3. Demographics and Delivery Outcomes by Availability of Follow-up Data

|                                             | Women with<br>follow up data<br>N=255 | Women without<br>follow up data<br>N=98 | p-value |
|---------------------------------------------|---------------------------------------|-----------------------------------------|---------|
| Age (years)                                 | 30 [26-34]                            | 31 [27-34]                              | 0.4     |
| Race                                        |                                       |                                         |         |
| Caucasian                                   | 170 (66.7%)                           | 65 (66.3%)                              | 0.3     |
| Non-Hispanic Black                          | 59 (23.1%)                            | 15 (15.3%)                              |         |
| Asian or Pacific Islander                   | 18 (7.1%)                             | 12 (12.2%)                              |         |
| Other or Unspecified                        | 8 (3.1%)                              | 6 (6.1%)                                |         |
| Pre-pregnancy BMI (kg/m <sup>2</sup> )†     | 25.0 [21.6-37.6]                      | 25.7 [22.3-30.1]                        | 0.9     |
| Highest first trimester systolic BP (mmHg)  | 116 [110-120]                         | 112 [107-120]                           | 0.1     |
| Highest first trimester diastolic BP (mmHg) | 70 [65-78]                            | 70 [62-76]                              | 0.2     |
| Nulliparous                                 | 122 (47.8%)                           | 43 (43.9%)                              | 0.5     |
| Multiparous                                 | 133 (52.2%)                           | 55 (56.1%)                              |         |
| Gestational diabetes                        | 17 (6.7%)                             | 6 (6.1%)                                | 0.8     |
| Gestational age at delivery (weeks)         | 39.1 [38.0-40.0]                      | 39.3 [38.3-40.0]                        | 0.8     |
| Birthweight (grams)                         | 3330 [2955-3645]                      | 3370 [3005-3685]                        | 0.5     |
| Cesarean delivery                           | 76 (29.8%)                            | 25 (25.5%)                              | 0.5     |
| Length of hospitalization (days)            | 2 [2-3]                               | 2 [2-2]                                 | 0.3     |

Data are n (%) or median [interquartile range] unless otherwise specified

†N= 250 with follow up, 95 without follow up (BMI data missing)
